# Supplementary material
Source: PubMed Central journal article supplement (PMC8246595)

## **Supplemental information**

### **CD177, a specific marker of neutrophil activation, is associated with coronavirus disease 2019 severity and death**

**Yves Lévy, Aurélie Wiedemann, Boris P. Hejblum, Mélanie Durand, Cécile Lefebvre, Mathieu Surénaud, Christine Lacabaratz, Matthieu Perreau, Emile Foucat, Marie Déchenaud, Pascaline Tisserand, Fabiola Blengio, Benjamin Hivert, Marine Gauthier, Minerva Cervantes-Gonzalez, Delphine Bachelet, Cédric Laouénan, Lila Bouadma, Jean-François Timsit, Yazdan Yazdanpanah, Giuseppe Pantaleo, Hakim Hocini, Rodolphe Thiébaud, and the French COVID cohort study group**

## Supplementary Information

### French Cohort Study Group

Laurent ABEL (Inserm UMR 1163, Paris, France), Claire ANDREJAK (CHU Amiens, France), François ANGOULVANT (Hôpital Necker, Paris, France), Delphine BACHELET, Krishna BHAVSAR, Lila BOUADMA, Anissa CHAIR, Camille COUFFIGNAL, Charlene DA SILVEIRA, Marie-Pierre DEBRAY, Diane DESCAMPS, Xavier DUVAL, Philippine ELOY, Marina ESPOSITO-FARESE, Nadia ETTALHAOUI, Nathalie GAULT, Jade GHOSN, Isabelle GORENNE, Isabelle HOFFMANN, Ouifiya KAFIF, Sabrina KALI, Antoine KHALIL, Cédric LAOUÉNAN, Samira LARIBI, Minh LE, Quentin LE HINGRAT, François-Xavier LESCURE, Jean Christophe LUCET, France MENTRÉ, Jimmy Mullaert, Nathan PEIFFER-SMADJA, Gilles PEYTAVIN, Carine ROY, Marion SCHNEIDER, Nassima SI MOHAMMED, Lysa TAGHERSET, Coralie TARDIVON, Marie-Capucine TELLIER, Jean-François TIMSIT, Théo TRIoux, Sarah TUBIANA, Benoit VISSEAU, Yazdan YAZDANPANAH (Hôpital Bichat, Paris, France), Romain BASMACI, Olivier PICONE (Hôpital Louis Mourier, Colombes, France), Sylvie BEHILILL, Sylvie VAN DER WERF, Vincent ENOUF, Hugo MOUQUET (Pasteur Institute, Paris, France), Marine BELUZE (F-CRIN Partners Platform, Paris, France), Dehbia BENKERROU, Céline DORIVAL, François TÉOULÉ, Amina MEZIANE (Inserm UMR 1136, Paris, France), François BOMPART (Drugs for Neglected Diseases initiative, Geneva, Switzerland), Maude BOUSCAMPÉRT (Inserm UMR 1111, Lyon, France), Minerva CERVANTES-GONZALEZ, Eric d'ORTENZIO, Oriane PUÉCHAL, Caroline SEMAILLE (REACTing, Paris, France), Catherine CHIROUZE (CHRU Jean Minjot, Besançon, France), Alexandra COELHO (Inserm UMR 1018, Paris, France), Sandrine COUFFIN-CADIERGUES, Hélène ESPEROU, Ikram HOUAS, Salma JAAFOURA, Aurélie PAPADOPOULOS (Inserm sponsor, Paris, France), Dominique DEPLANQUE (Hôpital Calmette, Lille, France), Mathilde DESVALLÉE, Coralie KHAN (Inserm UMR 1219, Bordeaux, France), Alpha DIALLO, Marie BARTOLI, Soizic LE MESTRE, Noémie MERCIER, Christelle PAUL, Ventzislava PETROV-SANCHEZ (ANRS, Paris, France), Alphonsine DIOUF, Alexandre HOCTIN, Marina MAMBERT (Inserm UMR 1018, Paris, France), François DUBOS (CHU Lille, France), Manuel ETIENNE (CHU Rouen, France), Alexandre GAYMARD (Inserm UMR 1111, Lyon, France), Tristan GIGANTE, Morgane GILG, Bénédicte ROSSIGNOL (F-CRIN INI-CRCT, Nancy, France), Jérémie GUEDJ, Hervé LE NAGARD, Guillaume LINGAS, Nadège NEANT (Inserm UMR 1137, Paris, France), Jean-Sébastien HULOT (Hôpital Européen Georges Pompidou, Paris, France), Florentia KAGUELIDOU, Justine PAGES (Hôpital Robert Debré, Paris, France), Yves LEVY, Aurélie WIEDEMANN (Vaccine Research Institute (VRI), Inserm UMR 955, Créteil, France), Claire LEVY-MARCHAL (F-CRIN INI-CRCT, Paris, France), Bruno LINA, Manuel ROSA-CALATRAVA, Olivier TERRIER (Inserm UMR 1111, Lyon, France), Denis MALVY (CHU Bordeaux, France), Marion NORET (RENARCI, Annecy, France), Patrick ROSSIGNOL (CHU Nancy, France), Christelle TUAL, Aurélie VEISLINGER (Inserm CIC-1414, Rennes, France), Noémie VANEL (Hôpital la Timone, Marseille, France)

**Table S1. Characteristics of COVID-19 patients described in the transcriptomic analysis, related to Figure 4**

|                                                               | No. | Group 1<br>(N = 10) | Group 2<br>(N = 16) | Group 3<br>(N = 18) |
|---------------------------------------------------------------|-----|---------------------|---------------------|---------------------|
| <b>Demographic characteristics</b>                            |     |                     |                     |                     |
| Age - Median (IQR) - years                                    | 44  | 57 (48 - 74)        | 61 (51 - 66)        | 61 (53 - 68)        |
| Male sex - No./total No. (%)                                  | 44  | 7/10 (70)           | 14/16 (88)          | 16/18 (89)          |
| ICU or transfer to ICU or death - No /total No.(%)            | 44  | 6/10 (60)           | 13/16 (81)          | 17/18 (94)          |
| Outcome - No./total No. (%)                                   | 44  |                     |                     |                     |
| Death                                                         |     | 4/10 (40)           | 4/16 (25)           | 5/18 (28)           |
| Discharge alive                                               |     | 6/10 (60)           | 12/16 (75)          | 13/18 (72)          |
| <b>Median interval from first symptoms on admission (IQR)</b> | 44  | 7 (6 - 11)          | 11 (10 - 14)        | 13 (9 - 14)         |
| <b>Comorbidities - No./total No. (%)</b>                      |     |                     |                     |                     |
| Any                                                           | 44  | 2/10 (10)           | 7/16 (44)           | 4/18 (22)           |
| Chronic cardiac disease                                       | 44  | 4/10 (10)           | 1/16 (6)            | 2/18 (11)           |
| Hypertension                                                  | 44  | 4/10 (40)           | 2/16 (12)           | 7/18 (39)           |
| Chronic pulmonary disease                                     | 44  | 0/10 (0)            | 1/16 (6)            | 2/18 (11)           |
| Asthma                                                        | 44  | 1/10 (10)           | 1/16 (6)            | 0/18 (0)            |
| Chronic kidney disease                                        | 44  | 0/10 (0)            | 0/16 (0)            | 3/18 (17)           |
| Chronic neurological disorder                                 | 44  | 0/10 (0)            | 1/16 (6)            | 0/18 (0)            |
| Obesity                                                       | 44  | 3/10 (30)           | 5/16 (31)           | 5/18 (28)           |
| Diabetes                                                      | 44  | 1/10 (10)           | 4/16 (25)           | 6/18 (33)           |
| <b>Smoking History - No./total No. (%)</b>                    |     |                     |                     |                     |
| Smoking                                                       | 44  | 0/10 (0)            | 3/16 (19)           | 1/18 (6)            |
| <b>Laboratory findings on admission - Median (IQR)</b>        |     |                     |                     |                     |
| Hemoglobin - g/dL                                             | 44  | 13 (12 - 15)        | 13 (12 - 14)        | 12 (11 - 14)        |
| WBC count - x10 <sup>9</sup> /L                               | 44  | 5 (5 - 6)           | 6 (5 - 9)           | 9 (6 - 13)          |
| Platelet count - x10 <sup>9</sup> /L                          | 44  | 179 (156 - 198)     | 188 (165 - 288)     | 204 (115 - 359)     |
| C-reactive protein (CRP) - mg/L                               | 44  | 61 (20 - 82)        | 121 (60 - 196)      | 152 (108 - 244)     |
| Blood Urea Nitrogen (urea) - mmol/L                           | 44  | 6 (5 - 7)           | 5 (3 - 10)          | 8 (6 - 12)          |
| <b>Symptoms on admission - No./total No. (%)</b>              |     |                     |                     |                     |
| Fever                                                         | 44  | 8/10 (80)           | 14/16 (88)          | 18/18 (100)         |
| Cough                                                         | 42  | 5/8 (63)            | 12/16 (75)          | 13/18 (72)          |
| Sore throat                                                   | 41  | 1/7 (14)            | 1/16 (6)            | 1/18 (6)            |
| Wheezing                                                      | 39  | 1/8 (13)            | 2/15 (13)           | 0/16 (0)            |
| Myalgia                                                       | 41  | 2/8 (25)            | 8/16 (50)           | 5/17 (29)           |
| Arthralgia                                                    | 40  | 1/8 (13)            | 2/15 (13)           | 4/17 (24)           |
| Fatigue                                                       | 42  | 2/8 (25)            | 8/16 (50)           | 8/18 (44)           |
| Dyspnea                                                       | 42  | 6/8 (75)            | 14/16 (88)          | 15/18 (83)          |
| Headache                                                      | 42  | 0/8 (0)             | 5/16 (31)           | 5/18 (28)           |
| Altered consciousness                                         | 41  | 0/8 (0)             | 0/15 (0)            | 2/18 (11)           |

|                                                             |    |                 |                 |                 |
|-------------------------------------------------------------|----|-----------------|-----------------|-----------------|
| Abdominal pain                                              | 38 | 0/8 (0)         | 1/14 (7)        | 3/16 (19)       |
| Vomiting / nausea                                           | 41 | 1/8 (13)        | 2/15 (13)       | 5/18 (28)       |
| Diarrhea                                                    | 41 | 1/8 (13)        | 4/15 (27)       | 5/18 (28)       |
| <b>Clinical characteristics on admission - Median (IQR)</b> |    |                 |                 |                 |
| SOFA score                                                  | 23 | 3 (1 - 4)       | 6 (4 - 7)       | 6 (3 - 7)       |
| SAPS2                                                       | 24 | 37 (22 - 52)    | 29 (28 - 38)    | 46 (31 - 61)    |
| Heart rate - beats per minute                               | 44 | 85 (80 - 92)    | 87 (72 - 105)   | 90 (75 - 103)   |
| Respiratory rate - breaths per minute                       | 40 | 19 (18 - 20)    | 27 (24 - 33)    | 22 (19 - 33)    |
| Systolic blood pressure - mmHg                              | 43 | 118 (108 - 145) | 139 (114 - 145) | 135 (121 - 158) |
| Diastolic blood pressure - mmHg                             | 43 | 74 (65 - 80)    | 78 (70 - 89)    | 74 (71 - 82)    |
| Oxygen saturation - percent                                 | 44 | 95 (93 - 98)    | 96 (91 - 97)    | 93 (87 - 97)    |
| Oxygen saturation on – No./total No. (%)                    | 44 |                 |                 |                 |
| Room air                                                    |    | 4/10 (40)       | 3/16 (19)       | 7/18 (39)       |
| Oxygen therapy                                              |    | 6/10 (60)       | 13/16 (81)      | 11/18 (61)      |
| <b>Treatments - No./total No. (%)</b>                       |    |                 |                 |                 |
| Antiviral                                                   | 43 | 5/10 (50)       | 10/16 (62)      | 14/17 (82)      |
| Antibiotic                                                  | 43 | 4/10 (40)       | 13/16 (81)      | 12/17 (71)      |
| Corticosteroids                                             | 43 | 1/10 (10)       | 8/16 (50)       | 10/17 (59)      |
| Antifungal                                                  | 43 | 0/10 (0)        | 2/16 (12)       | 3/17 (18)       |
| Hydroxychloroquine                                          | 43 | 0/10 (0)        | 3/16 (19)       | 3/17 (18)       |

**Table S2. All BCR related genes, related to Figure 3**

| ALL BCR related genes |             |          |                    |            |           |                     |            |           |
|-----------------------|-------------|----------|--------------------|------------|-----------|---------------------|------------|-----------|
| Genes                 | FDR         | Log2 FC  | Genes              | FDR        | Log2 FC   | Genes               | FDR        | Log2 FC   |
| <i>IGHV1-24</i>       | 0.030581621 | 5.407268 | <i>IGHV3-73</i>    | 0.0220482  | 2.725353  | <i>IGHV1-17</i>     | 0.01725323 | 2.231395  |
| <i>IGLV3-10</i>       | 0.026473188 | 4.282412 | <i>IGLV3-9</i>     | 0.0220482  | 2.712686  | <i>IGLV2-28</i>     | 0.04153633 | 2.201201  |
| <i>IGLV3-25</i>       | 0.012346539 | 3.90591  | <i>IGLC1</i>       | 0.01725323 | 2.701069  | <i>IGKV6D-21</i>    | 0.01234654 | 2.184745  |
| <i>IGLV3-27</i>       | 0.022048198 | 3.885845 | <i>IGHJ4</i>       | 0.01234654 | 2.669988  | <i>IGLJ1</i>        | 0.04473672 | 2.173331  |
| <i>IGLV1-36</i>       | 0.017253229 | 3.863016 | <i>IGHJ1</i>       | 0.01725323 | 2.6633    | <i>IGLV8-61</i>     | 0.01725323 | 2.173024  |
| <i>IGLV3-1</i>        | 0.00397524  | 3.837419 | <i>IGHV4-61</i>    | 0.0220482  | 2.656812  | <i>IGKV1-6</i>      | 0.0220482  | 2.168246  |
| <i>IGLV4-69</i>       | 0.017253229 | 3.739889 | <i>IGKV3-15</i>    | 0.0009382  | 2.651675  | <i>IGKV2D-40</i>    | 0.03438457 | 2.163532  |
| <i>IGLV3-19</i>       | 0.01061534  | 3.735987 | <i>IGKV4-1</i>     | 0.00028687 | 2.644773  | <i>IGHV1OR15-4</i>  | 0.03058162 | 2.151865  |
| <i>IGHV1-18</i>       | 0.017253229 | 3.667556 | <i>IGHA1</i>       | 0.00397524 | 2.634013  | <i>IGHV3-71</i>     | 0.0220482  | 2.089232  |
| <i>IGHV3-21</i>       | 0.017253229 | 3.587602 | <i>IGKV1-27</i>    | 0.04153633 | 2.63176   | <i>IGKV1D-37</i>    | 0.00746691 | 2.06909   |
| <i>IGLV6-57</i>       | 0.017253229 | 3.512432 | <i>IGHV4-28</i>    | 0.01725323 | 2.614677  | <i>IGHV3-72</i>     | 0.03058162 | 2.067323  |
| <i>IGHV4-34</i>       | 0.017253229 | 3.463972 | <i>IGLV2-11</i>    | 0.01234654 | 2.609628  | <i>IGHV3-41</i>     | 0.0220482  | 2.055012  |
| <i>IGHV4-39</i>       | 0.017253229 | 3.444361 | <i>IGLV5-37</i>    | 0.04153633 | 2.605725  | <i>IGHG4</i>        | 0.02647319 | 2.053045  |
| <i>IGHV3-33</i>       | 0.000286867 | 3.435046 | <i>IGKV3-20</i>    | 0.00028687 | 2.554925  | <i>IGHV3-63</i>     | 0.01725323 | 2.051185  |
| <i>IGHV3-11</i>       | 0.030581621 | 3.421957 | <i>IGHV1-58</i>    | 0.02647319 | 2.543716  | <i>IGKV2D-28</i>    | 0.01725323 | 2.018281  |
| <i>IGHG3</i>          | 0.000938197 | 3.407473 | <i>IGKV1-5</i>     | 0.00746691 | 2.511011  | <i>IGKV3-7</i>      | 0.01725323 | 1.963918  |
| <i>IGHV1-46</i>       | 0.022048198 | 3.39981  | <i>IGKV2-29</i>    | 0.01725323 | 2.488949  | <i>IGHGP</i>        | 0.04786254 | 1.915987  |
| <i>IGHV3-15</i>       | 0.012346539 | 3.396577 | <i>IGKV3-11</i>    | 0.0220482  | 2.489234  | <i>IGHV3-60</i>     | 0.04153633 | 1.874073  |
| <i>IGHV3-20</i>       | 0.022048198 | 3.383072 | <i>IGKV1D-33</i>   | 0.04153633 | 2.460444  | <i>IGKV2D-24</i>    | 0.04786254 | 1.87279   |
| <i>IGHV3-43</i>       | 0.012346539 | 3.310178 | <i>IGL3</i>        | 0.0220482  | 2.421166  | <i>IGHV3OR16-9</i>  | 0.01725323 | 1.844052  |
| <i>IGHV3-23</i>       | 0.000286867 | 3.299521 | <i>IGLV3-16</i>    | 0.01725323 | 2.411455  | <i>IGHG2</i>        | 0.04473672 | 1.749984  |
| <i>IGHV2-26</i>       | 0.012346539 | 3.284427 | <i>IGHV3-64</i>    | 0.03058162 | 2.405988  | <i>IGLV7-43</i>     | 0.03810136 | 1.716134  |
| <i>IGLV1-51</i>       | 0.012346539 | 3.25168  | <i>IGHV6-21</i>    | 0.00053237 | 2.400168  | <i>IGHV3-69-1</i>   | 0.03810136 | 1.711671  |
| <i>IGLC3</i>          | 0.022048198 | 3.193759 | <i>IGKV1-17</i>    | 0.0220482  | 2.398496  | <i>IGKV1OR2-108</i> | 0.04786254 | 1.670756  |
| <i>IGLV1-44</i>       | 0.017253229 | 3.081442 | <i>IGHV3-74</i>    | 0.00162353 | 2.393907  | <i>IGKV1D-8</i>     | 0.01725323 | 1.649229  |
| <i>IGLJ2</i>          | 0.012346539 | 3.054996 | <i>IGLL1</i>       | 0.70867098 | 0.2706642 | <i>IGHJ3P</i>       | 0.00746691 | 1.609411  |
| <i>IGHV3-13</i>       | 0.026473188 | 3.03438  | <i>IGHV3-19</i>    | 0.01725323 | 2.376945  | <i>IGKJ5</i>        | 0.0220482  | 1.479375  |
| <i>IGLC2</i>          | 0.030581621 | 3.02678  | <i>IGKV3D-15</i>   | 0.01725323 | 2.367281  | <i>IGHGP2</i>       | 0.00162353 | 1.42042   |
| <i>IGKV1-33</i>       | 0.01061534  | 2.986319 | <i>IGKV1D-39</i>   | 0.01725323 | 2.354587  | <i>IGHVIII-2-1</i>  | 0.04473672 | -0.664831 |
| <i>IGKV2D-30</i>      | 0.04473672  | 2.971709 | <i>IGHV4-55</i>    | 0.01234654 | 2.353481  |                     |            |           |
| <i>IGKV1D-16</i>      | 0.01061534  | 2.964449 | <i>IGKV1-9</i>     | 0.02647319 | 2.31918   |                     |            |           |
| <i>IGHV4-59</i>       | 0.004544213 | 2.959443 | <i>IGHJ2</i>       | 0.04473672 | 2.307147  |                     |            |           |
| <i>IGLV1-40</i>       | 0.007466914 | 2.951791 | <i>IGLV2-18</i>    | 0.02647319 | 2.304288  |                     |            |           |
| <i>IGHJ3</i>          | 0.012346539 | 2.94855  | <i>IGLV1-50</i>    | 0.04153633 | 2.300749  |                     |            |           |
| <i>IGKV3OR2-268</i>   | 0.017253229 | 2.925686 | <i>IGKC</i>        | 0.01725323 | 2.298358  |                     |            |           |
| <i>IGHV5-51</i>       | 0.007466914 | 2.914603 | <i>IGHV1OR15-9</i> | 0.0220482  | 2.291757  |                     |            |           |
| <i>IGLV10-54</i>      | 0.022048198 | 2.911357 | <i>IGLV7-46</i>    | 0.02647319 | 2.273516  |                     |            |           |
| <i>IGLV1-47</i>       | 0.007466914 | 2.907312 | <i>IGKV2-24</i>    | 0.04786254 | 2.270762  |                     |            |           |
| <i>IGHV3-49</i>       | 0.012346539 | 2.905982 | <i>IGLC6</i>       | 0.04473672 | 2.264953  |                     |            |           |
| <i>IGKV2-28</i>       | 0.017253229 | 2.882124 | <i>IGLV2-5</i>     | 0.01061534 | 2.263166  |                     |            |           |
| <i>IGLVI-70</i>       | 0.034384566 | 2.859006 | <i>IGKV3D-20</i>   | 0.01234654 | 2.262339  |                     |            |           |
| <i>IGHJ5</i>          | 0.017253229 | 2.846426 | <i>IGLV4-3</i>     | 0.0220482  | 2.259118  |                     |            |           |
| <i>IGLV2-23</i>       | 0.012346539 | 2.835207 | <i>IGHM</i>        | 0.02647319 | 2.257772  |                     |            |           |
| <i>IGLV2-8</i>        | 0.047862536 | 2.81604  | <i>IGKV1-16</i>    | 0.02647319 | 2.258257  |                     |            |           |
| <i>IGLV2-14</i>       | 0.000286867 | 2.802055 | <i>IGHV1OR15-2</i> | 0.03058162 | 2.257497  |                     |            |           |
| <i>IGLV9-49</i>       | 0.012346539 | 2.800455 | <i>IGKV5-2</i>     | 0.0153988  | 2.242023  |                     |            |           |
| <i>IGLV3-21</i>       | 0.034384566 | 2.743388 | <i>IGLV5-45</i>    | 0.01725323 | 2.235904  |                     |            |           |

**Table S3. Characteristics of healthy donors (HD) involved in the various assays, related to STAR Methods**

| <b>Assay</b>                        | <b>Immune cell phenotypes</b> | <b>Serum cytokine measurement</b> | <b>RNA-seq</b> | <b>Serum CD177 measurement</b> |
|-------------------------------------|-------------------------------|-----------------------------------|----------------|--------------------------------|
| <b>n</b>                            | 18                            | 5                                 | 10             | 16                             |
| <b>Age – years - Median (IQR)</b>   | 36 (30 - 45)                  | 30 (28 - 51)                      | 33 (29 - 38)   | 26 (22 – 50)                   |
| <b>Male sex - nbr/total nbr (%)</b> | 16/18 (89)                    | 2/5 (40)                          | 10/10 (100)    | 6/16 (38)                      |

Figure S1 Phenotype gating strategy of immune cells, related to Figure 1

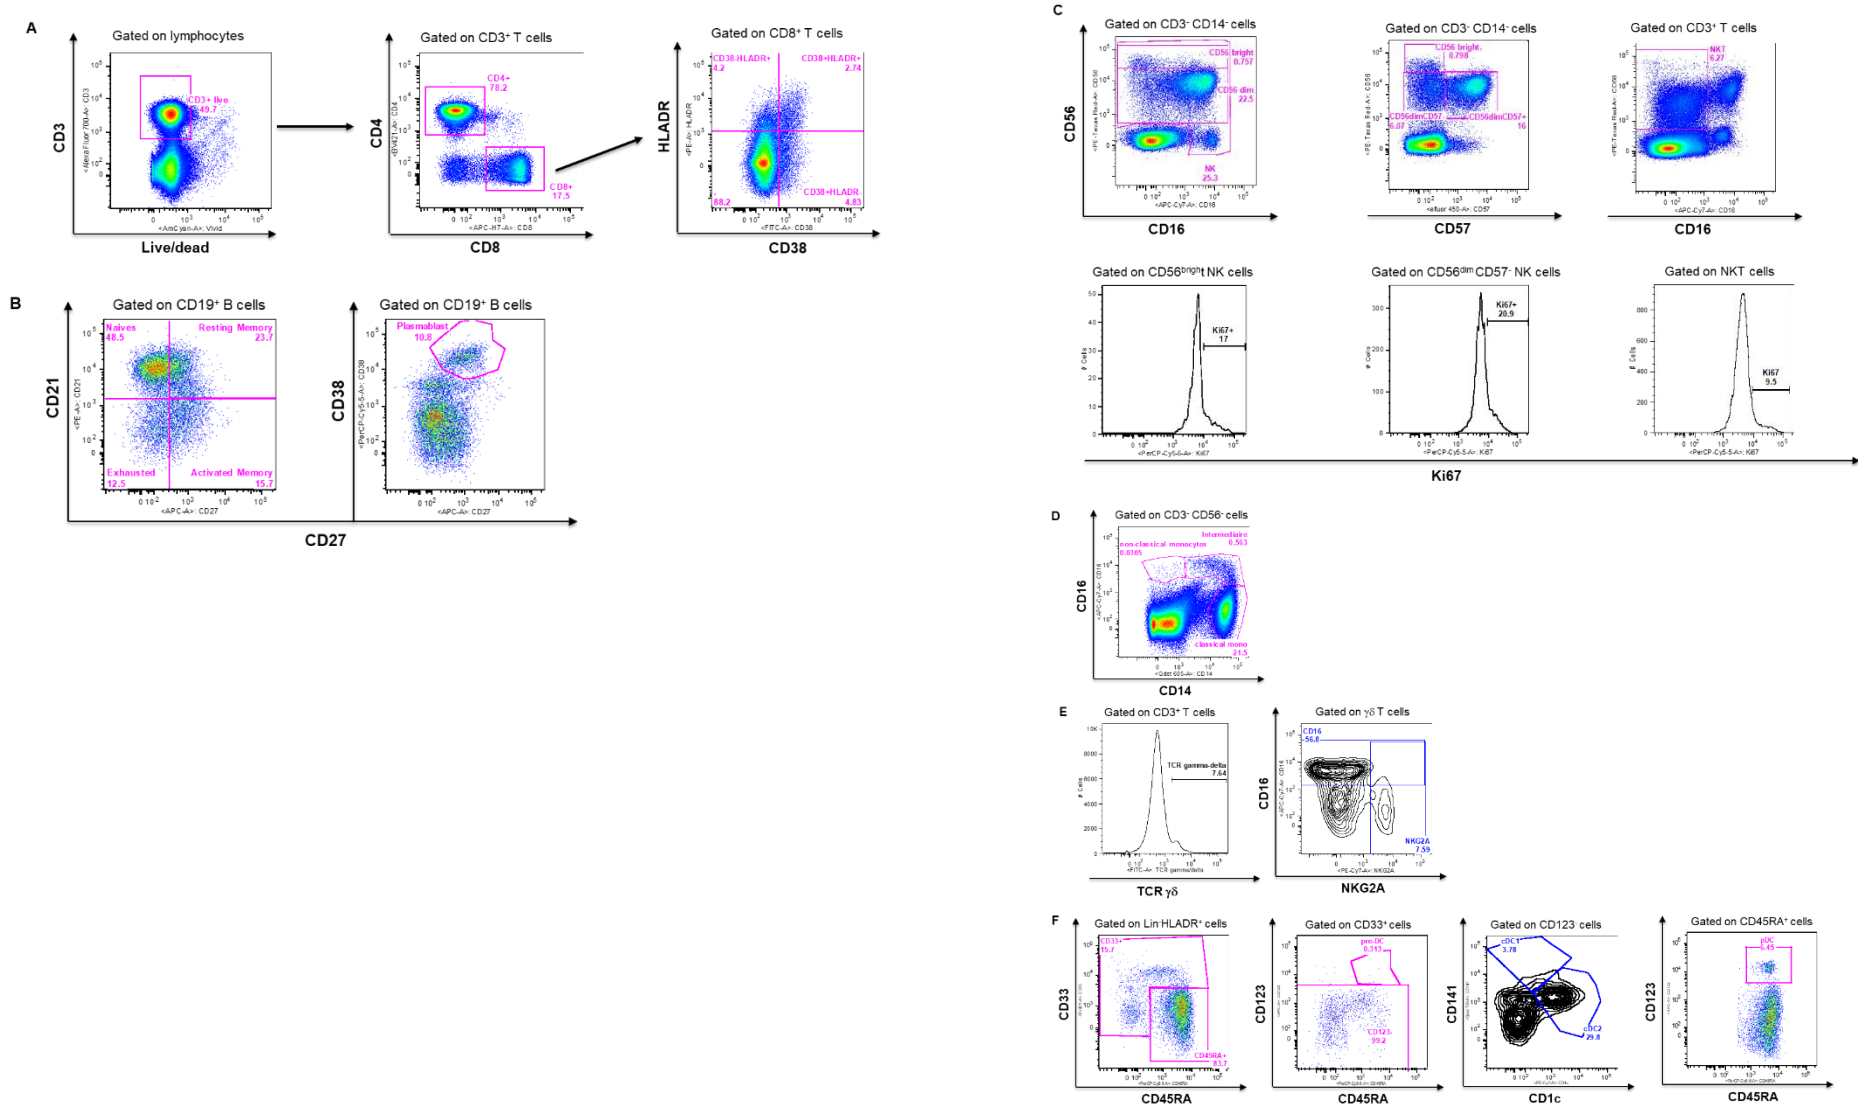

**Figure S2. Heatmap of standardized immune-cell subset phenotypic characterization in PBMCs, related to Figure 1**

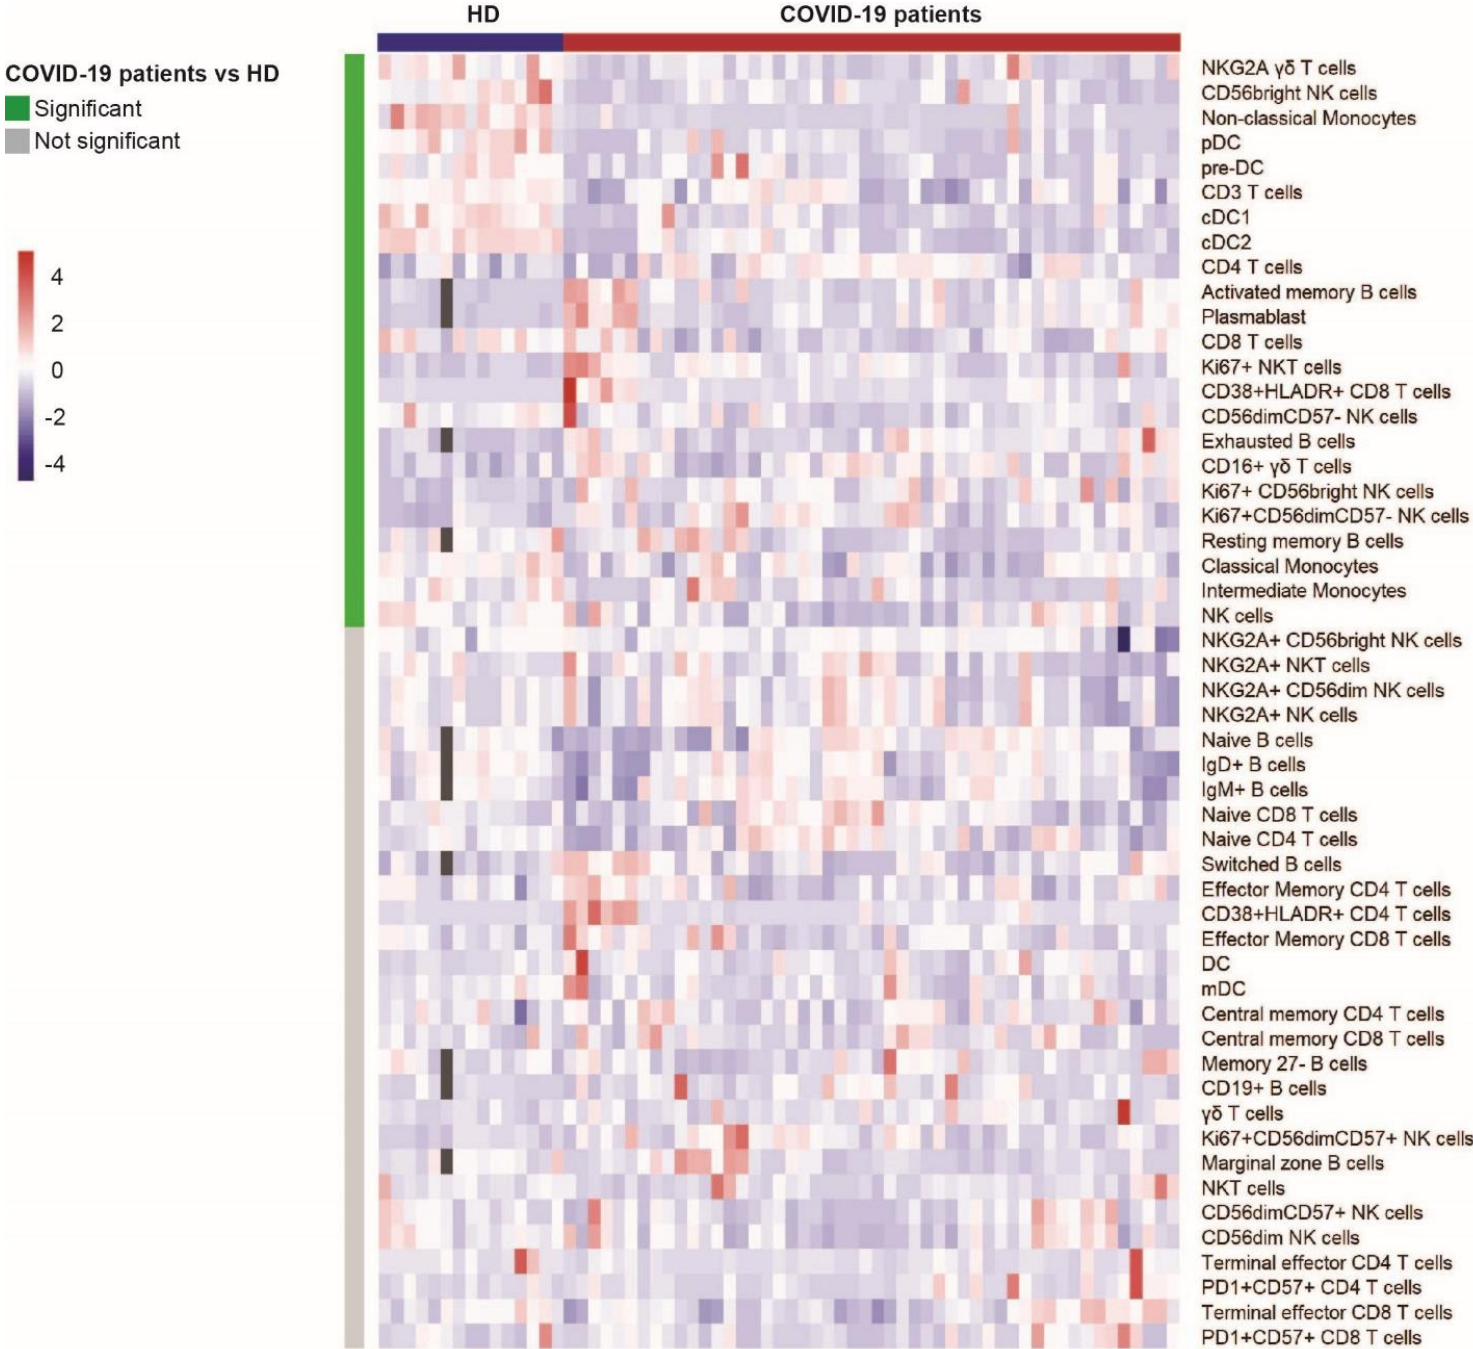



Figure S3. Quantification of soluble mediators differentially present in the serum of COVID19 patients, related to Figure 2

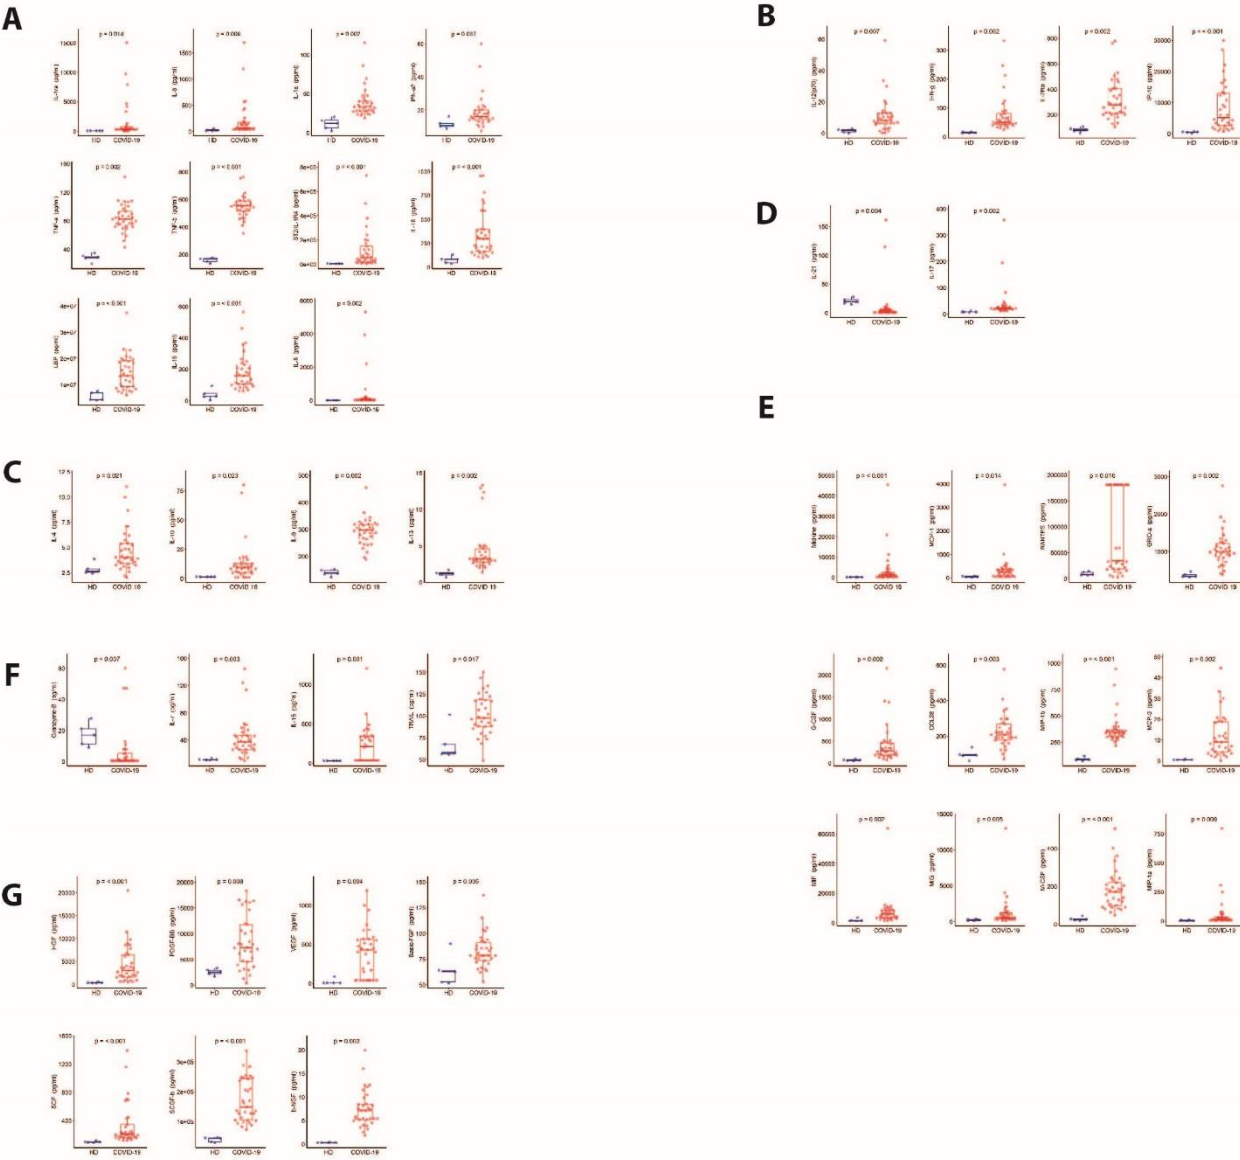



**Figure S5. Integrative analysis from COVID-19 patients.** Integrative score from MOFA+ of the patient groups defined by the hierarchical clustering of the RNA-seq shown as in Figure 5A. The higher CD177 expression in log2 cpm normalized counts across groups is represented by the intensity of the color. **Related to Figure 5**

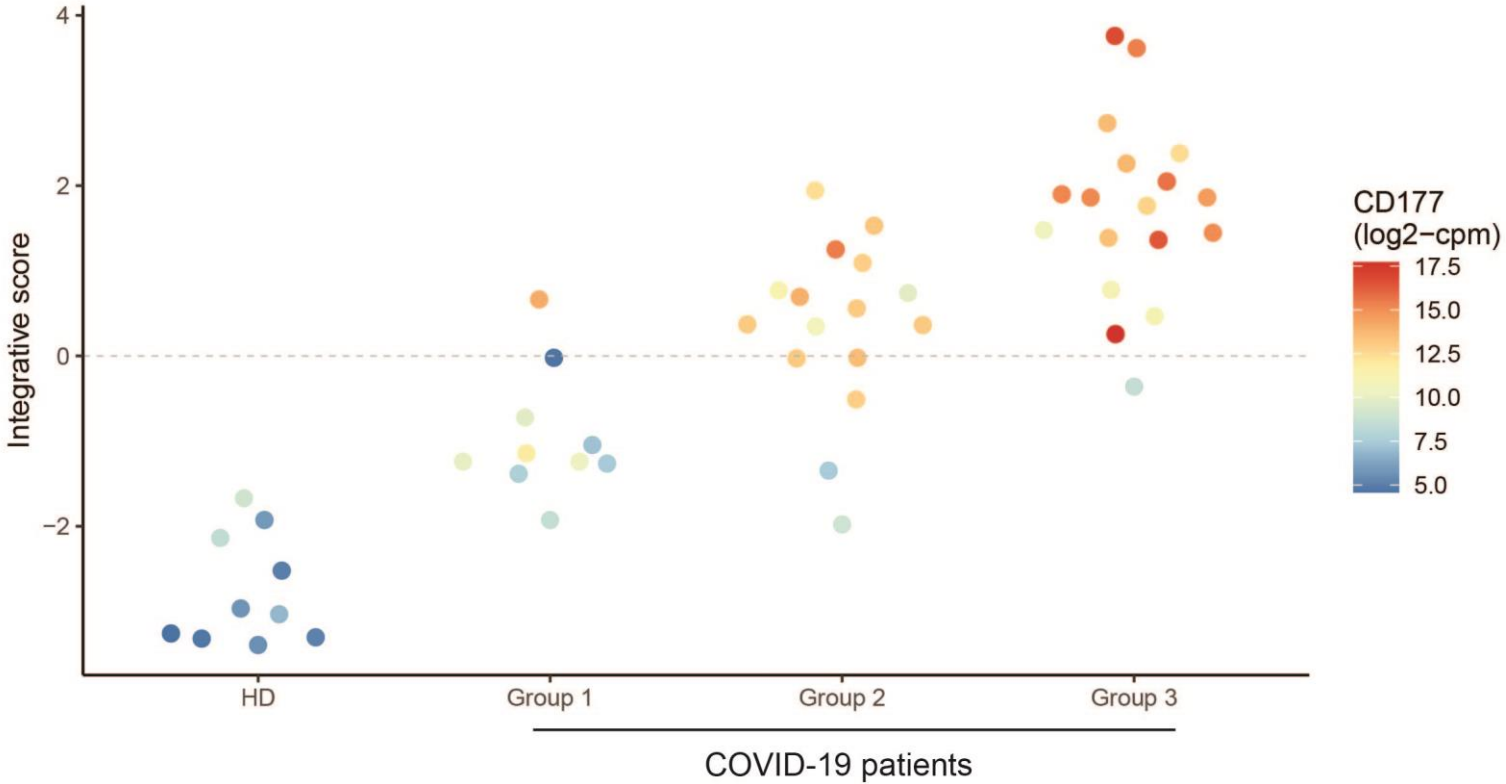

**Figure S6.** Association between CD177 serum concentration and **A.** SOFA (n = 41) and **B.** SAPS2 (n=40) risk scores. The blue line represents the linear regression and the grey area is the 95% confidence interval. **Related to Figure 6**

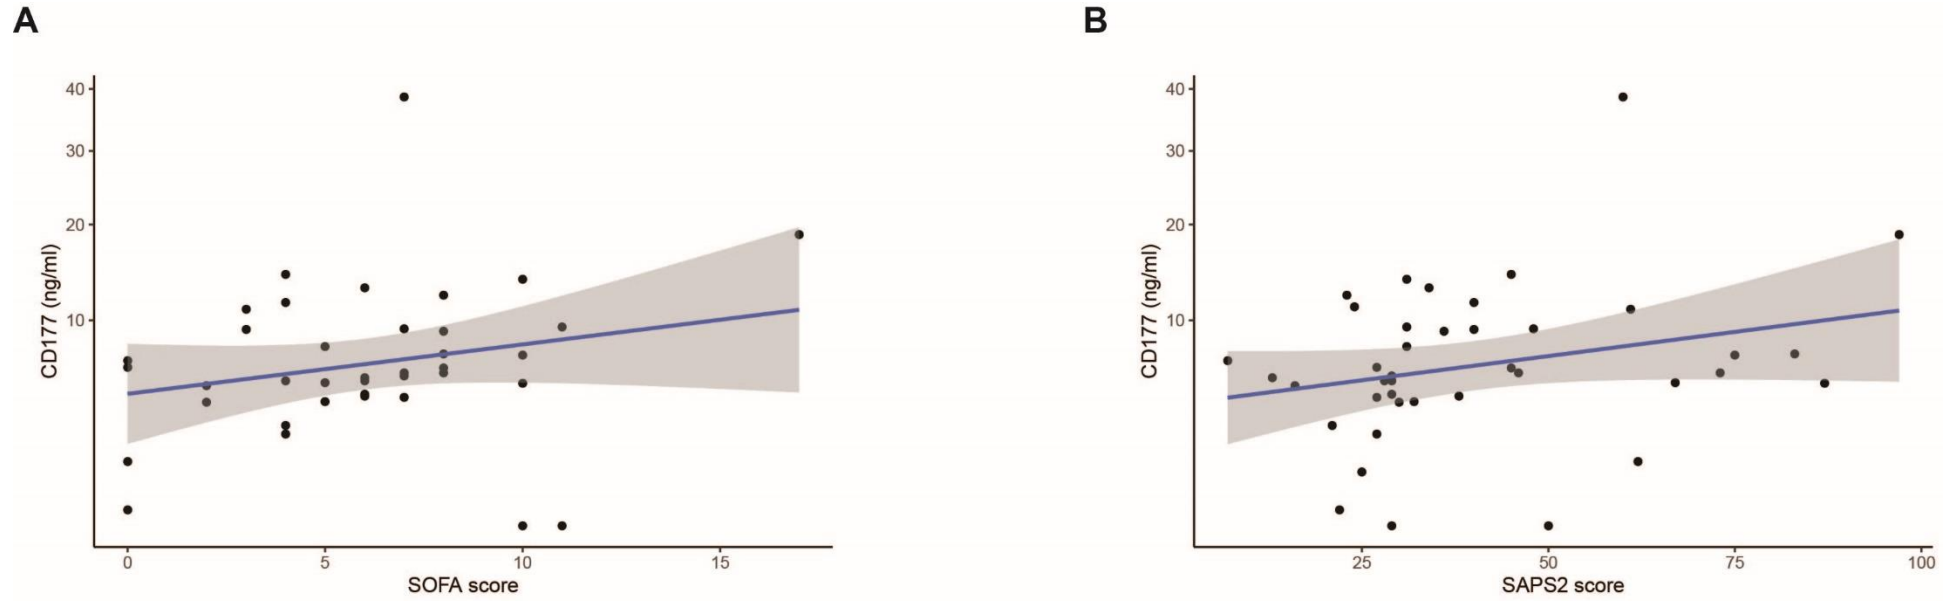

Supplement: mmc1.pdf [file mmc1.pdf]
